# Supplementary material
Source: PubMed Central journal article supplement (PMC2662981)
Supplement: supp_173_1_42__1.pdf [file supp_173_1_42__1.pdf]

## **Importance of Myeloid Dendritic Cells in Persistent Airway Disease After Repeated Allergen Exposure**

Toshiyuki Koya, Taku Kodama, Katsuyuki Takeda, Nobuaki Miyahara, Eun-Seok Yang, Christian Taube, Anthony Joetham, Jung-Won Park, Azzeddine Dakhama, Erwin W. Gelfand\*

**Online Data Supplement**

**Table E1.** Comparison of protocol and outcome in repeated allergen challenge models.

| Reference     | Cho J. et al (55) | Leigh R. et al (60) | Johnson J. et al (56) | Shinagawa K. et al (57) | Temelkovski J. et al (58) | Sakai K. et al (59) | Current Study     |
|---------------|-------------------|---------------------|-----------------------|-------------------------|---------------------------|---------------------|-------------------|
| Strain        | BALB/c            | BALB/c              | BALB/c                | A/J                     | BALB/c                    | BALB/c              | BALB/c<br>C57BL/6 |
| Antigen       | OVA               | OVA                 | HDM                   | OVA                     | OVA                       | OVA                 | OVA               |
| Sensitization | s.c.              | i.p.                | -                     | -                       | i.p.                      | i.p.                | i.p.              |
| challenge     | i.n.              | i.n.                | i.n.                  | i.n.                    | Neb                       | Neb                 | Neb               |
| Frequency     | 2times/w          | 2times/2w           | 5times/w              | 3times/w                | 3times/w                  | 3times/w            | 2times/w          |
| Duration      | 12weeks           | 10weeks             | 5weeks                | 12weeks                 | 8weeks                    | 8weeks              | 6weeks            |

**Comparison of end point vs earlier point**

|                        |    |    |   |    |    |    |   |
|------------------------|----|----|---|----|----|----|---|
| AHR                    | →# | →* | ? | →# | →# | ↓# | ↓ |
| Eosinophilia in BALF   | ↓  | ↓  | → | →  | ?  | ↓  | ↓ |
| in Tissue              | ?  | ↓  | ? | ?  | ↑  | ↓  | ↓ |
| Th2 cytokine elevation | →  | ↓  | → | ↓  | ?  | ↓  | ↓ |
| Mucus metaplasia       | ↑  | →  | ? | →  | →  | ↓  | ↓ |
| Collagen deposition    | →  | →  | → | ↑  | →  | →  | ↓ |
| Airway smooth muscle   | →  | →  | ↑ | ↑  | ?  | ?  | ↓ |

HDM:House Dust Mite, i.p.:intraperitoneal, i.n.:intranasal. s.c. :subcutaneous.. ?:unknown. - : not done.

↓ : decrease ↑ : increase → : maintain \* : methacholine i.v. # : Penh
